# Supplementary material
Source: Springer Nature journal article supplement (https://www.springermedizin.de/resource/supplementary/13063_2011_978_MOESM6_ESM.pdf/9619556)
Supplement: MOESM6 [file 9619556]

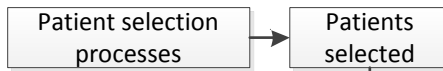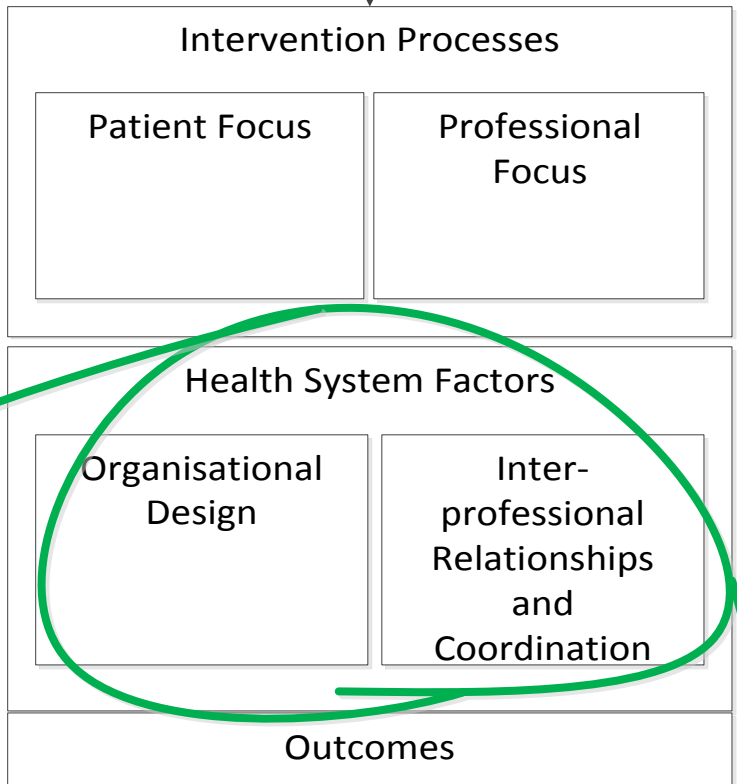

## Evaluation Processes for MedReDi

### Health System Factors

#### Organisational Design

- organisational enablers – pharmacist comments on referral letter quality
- organisational barriers - % GP acceptance of dHMR referral

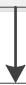

- Combined effect of organisational enablers and barriers on overall intervention process - % dHMRs that progress per protocol compared to those that do not

#### Inter-professional Relationships and Coordination

- Is inter-professional collaboration able to occur? – % dHMRs that progress per protocol
- What is the quality of this collaboration? – written/verbal/face to face
- What happens when this doesn't occur? – control group
